# Supplementary material for: The Plasmidomic Landscape of Clinical Methicillin-Resistant Staphylococcus aureus Isolates from Malaysia
Source: MDPI journal article supplement (doi:10.3390/antibiotics12040733), 2023-04-09
Supplement: s1 [file s1]

**Supplementary Table S1.** List of plasmids and their genetic characteristics identified in this study along with their respective GenBank accession numbers.

| Strain code | Year of isolation / Source of strain | Clonal Complex (CC) | Strain accession no. | Chromosome coverage (average) | Resistance phenotype*                                                      | Plasmid name        | Size of plasmid in bp | Plasmid accession no. | Plasmid coverage (average) | Replicon type (Conserved domain)                  | Mobility mechanism(s)                              | Antimicrobial resistance determinant(s) |
|-------------|--------------------------------------|---------------------|----------------------|-------------------------------|----------------------------------------------------------------------------|---------------------|-----------------------|-----------------------|----------------------------|---------------------------------------------------|----------------------------------------------------|-----------------------------------------|
| SauR3       | 2016 / blood                         | CC1                 | JAIVEG010000000      | 677.50                        | FOX, OX, P, CFP, CIP, MXF, E, DA, CN; MDR (5 classes); iMLSB               | pSauR3-1            | 22,425                | JAIVEG020000065       | 750.10                     | rep19 (RepA_N) + rep20 (RepA_N) + Δrep21 (ΔRep_1) | pWBG749 oriT-OT49 mimic & pWBG749 oriT-OTUNa mimic | none                                    |
|             |                                      |                     |                      |                               |                                                                            | pSauR3-2            | 3,011                 | JAIVEG010000047.1     | 3391.8                     | rep21 (Rep_1)                                     | pWBG749 oriT-OT49 mimic + rep-rlx                  | none                                    |
|             |                                      |                     |                      |                               |                                                                            | pSauR3-3            | 2,473                 | JAIVEG020000046.1     | 3479.2                     | rep10 (RepL)                                      | none                                               | ermC                                    |
| SauR7       | 2016 / pus                           | NA                  | JAHGAB000000000      | 454.6                         | FOX, OX, P, CFP, CIP, MXF, E, CN, AK, SXT, TE, DO, MH; MDR (6 classes); MS | pSauR7              | 4,459                 | JAHGAB010000043.1     | 3465.2                     | rep7a (Rep_trans)                                 | Mob/pre (MOBV)                                     | tetK                                    |
| SauR14      | 2016 / blood                         | CC22                | JAHKNP000000000      | 385.7                         | FOX, OX, P, CFP, CIP, MXF, E, DA; MDR (4 classes); iMLSB                   | pSauR14-1           | 35,641                | JAHKNP010000031.1     | 1,415.6                    | rep20 (RepA_N) + rep5a (Rep_3)                    | Mob/pre (MOBV)                                     | none                                    |
|             |                                      |                     |                      |                               |                                                                            | pSauR14-2           | 3,050                 | JAHKNP010000045.1     | 3408.6                     | rep21 (Rep_1)                                     | pWBG749 oriT-OT49 mimic+ rep-rlx                   | none                                    |
|             |                                      |                     |                      |                               |                                                                            | pSauR14-3           | 2,528                 | JAHKNP010000046.1     | 3260.7                     | rep10 (RepL)                                      | None                                               | ermC                                    |
| SauR23      | 2016 / pus                           | CC22                | JAIVEH000000000      | 614.4                         | FOX, OX, P, CFP, CIP, MXF, E, DA, CN, AK, FD, TE; MDR (7 classes); iMLSB   | pSauR23-1           | 58,422                | JAIVEH010000014.1     | 753.2                      | repUS20                                           | conjugative                                        | none                                    |
|             |                                      |                     |                      |                               |                                                                            | pSauR23-2           | 3,011                 | JAIVEH010000068.1     | 7630.8                     | rep21 (Rep_1)                                     | pWBG749 oriT-OT49 mimic + rep-rlx                  | none                                    |
|             |                                      |                     |                      |                               |                                                                            | pSauR23-3           | 2,473                 | JAIVEH010000073.1     | 7679.8                     | rep10 (RepL)                                      | none                                               | ermC                                    |
| SauR37      | 2016 / pus                           | CC1                 | JAHMGF000000000      | 922.0                         | FOX, OX, P, CFP, CIP, MXF, E, CN, AK, SXT; MDR (5 classes); MS             | no plasmid detected | -                     | -                     | NA                         | -                                                 | -                                                  | -                                       |
| SauR42      | 2016 / respiratory                   | CC22                | JAHMKI000000000      | 546.5                         | FOX, OX, P, CFP, CIP, MXF, E, DA; MDR (4 classes); iMLSB                   | pSauR42-1           | 35,337                | JAHMKI010000020.1     | 1063.2                     | rep20 (RepA_N) + rep5a (Rep_3)                    | Mob/pre (MOBV)                                     | none                                    |
|             |                                      |                     |                      |                               |                                                                            | pSauR42-2           | 2,600                 | JAHMKI010000025.1     | 7749.7                     | rep10 (RepL)                                      | none                                               | ermC                                    |

\*Abbreviations used: **β-lactams**: penicillin, P; oxacillin, OX; cefoxitin, FOX; cefoperazone, CFP; **fluoroquinolones**: ciprofloxacin, CIP; moxifloxacin, MXF; **macrolides**: erythromycin, E; **lincosamides**: clindamycin, DA; **aminoglycosides**: gentamicin, CN; amikacin, AK; **folate inhibitors**: co-trimoxazole, SXT; **fucidan**, fusidic acid, FD; **tetracyclines**: tetracycline, TE; doxycycline, DO; minocycline, MH; **glycylcyclines**: tigecycline, TGC; **phenicols**: chloramphenicol, C; **monocarboxylic acid**: mupirocin, MUP; **ansamycins**: rifampin, RD; **aminocoumarin**: novobiocin, NV; **glycopeptides**: vancomycin, VA; teicoplanin, TEC; **oxazolidinones**: linezolid, LZD; **phosphonic acids**: fosfomicin, FOT; **streptogramins**: quinupristin-dalfopristin, QD; **anti-MRSA cephalosporins**: ceftaroline, CPT. **MLS<sub>B</sub> phenotypes**: inducible (I), iMLSB; constitutive (C), cMLSB; macrolide-streptogramin, MS. MDR, multidrug resistance (resistance ≥ 3 classes of antimicrobials).

Supplementary Table S1

| Strain code | Year of isolation / source of strain | Clonal Complex (CC) | Strain accession no. | Chromosome coverage (average) | Resistance phenotype*                                               | Plasmid name | Size of plasmid in bp | Plasmid accession no. | Plasmid coverage (average) | Replicon type (Conserved domain) | Mobility mechanism(s)             | Antimicrobial resistance determinant(s) |
|-------------|--------------------------------------|---------------------|----------------------|-------------------------------|---------------------------------------------------------------------|--------------|-----------------------|-----------------------|----------------------------|----------------------------------|-----------------------------------|-----------------------------------------|
| SauR46      | 2016 / pus                           | CC22                | JAHKNQ000000000      | 424.5                         | FOX, OX, P, CFP, CIP, MXF, E, DA; MDR (4 classes); cMLSB            | pSauR46-1    | 35,251                | JAHKNQ010000030.1     | 1775.05                    | rep20 (RepA_N) + rep5a (Rep_3)   | Mob/pre (MOBV)                    | none                                    |
|             |                                      |                     |                      |                               |                                                                     | pSauR46-2    | 3,050                 | JAHKNQ010000047.1     | 3452.9                     | rep21 (Rep_1)                    | pWBG749 oriT-OT49 mimic + rep-rlx | none                                    |
|             |                                      |                     |                      |                               |                                                                     | pSauR46-3    | 2,422                 | JAHKNQ010000048.1     | 3630.6                     | rep10 (RepL)                     | none                              | ermC                                    |
| SauR47      | 2016 / pus                           | CC22                | JAHHIP000000000      | 407.5                         | FOX, OX, P, CFP, CIP, MXF, E, DA, CN, AK, C; MDR (6 classes); iMLSB | pSauR47-1    | 36,031                | JAHHIP010000022.1     | 2234.55                    | rep20 (RepA_N) + rep5a (Rep_3)   | Mob/pre (MOBV)                    | none                                    |
|             |                                      |                     |                      |                               |                                                                     | pSauR47-2    | 4,596                 | JAHHIP010000027.1     | 6482.7                     | rep7a (Rep_trans)                | mobCAB/MOBP                       | cat                                     |
|             |                                      |                     |                      |                               |                                                                     | pSauR47-3    | 3,011                 | JAHHIP010000031.1     | 7484.0                     | rep21 (Rep_1)                    | pWBG749 oriT-OT49 mimic + rep-rlx | none                                    |
|             |                                      |                     |                      |                               |                                                                     | pSauR47-4    | 2,473                 | JAHHIP010000033.1     | 7564.1                     | rep10 (RepL)                     | none                              | ermC                                    |
| SauR49      | 2016 / blood                         | CC22                | JAHMGG000000000      | 613.5                         | FOX, OX, P, CFP, CIP, MXF, E, DA; MDR (4 classes); iMLSB            | pSauR49-1    | 35,337                | JAHMGG010000021.1     | 1654.0                     | rep20 (RepA_N) + rep5a (Rep_3)   | Mob/pre (MOBV)                    | none                                    |
|             |                                      |                     |                      |                               |                                                                     | pSauR49-2    | 2,600                 | JAHMGG010000027.1     | 7648.6                     | rep10 (RepL)                     | none                              | ermC                                    |
| SauR53      | 2016 / blood                         | CC22                | JAHMGH000000000      | 685.2                         | FOX, OX, P, CFP, CIP, MXF, E, DA; MDR (4 classes); iMLSB            | pSauR53-1    | 35,337                | JAHMGH010000020.1     | 2.864.8                    | rep20 (RepA_N) + rep5a (Rep_3)   | Mob/pre (MOBV)                    | none                                    |
|             |                                      |                     |                      |                               |                                                                     | pSauR53-2    | 2,600                 | JAHMGH010000025.1     | 7748.6                     | rep10 (RepL)                     | none                              | ermC                                    |
| SauR57      | 2016 / pus                           | CC22                | JAIXHC000000000      | 318.4                         | FOX, OX, P, CFP, CIP, MXF, E, DA; MDR (4 cl.); iMLSB                | pSauR57-1    | 3,011                 | JAIXHC010000031.1     | 6460.1                     | rep21 (Rep_1)                    | pWBG749 oriT-OT49 mimic + rep-rlx | none                                    |
|             |                                      |                     |                      |                               |                                                                     | pSauR57-2    | 2,473                 | JAIXHC010000033.1     | 5457.5                     | rep10 (RepL)                     | none                              | ermC                                    |
| SauR58      | 2016 / respiratory                   | CC22                | JAINVC000000000      | 312.3                         | FOX, OX, P, CFP, CIP, MXF, E, DA; MDR (4 classes); cMLSB            | pSauR58-1    | 35,337                | JAINVC010000023.1     | 1280.2                     | rep20 (RepA_N) + rep5a (Rep_3)   | Mob/pre (MOBV)                    | none                                    |
|             |                                      |                     |                      |                               |                                                                     | pSauR58-2    | 3,138                 | JAINVC010000028.1     | 7648.9                     | rep21 (Rep_1)                    | pWBG749 oriT-OT49 mimic + rep-rlx | none                                    |
|             |                                      |                     |                      |                               |                                                                     | pSauR58-3    | 2,600                 | JAINVC010000030.1     | 7486.9                     | rep10 (RepL)                     | none                              | ermC                                    |

\*Abbreviations used:  **$\beta$ -lactams**: penicillin, P; oxacillin, OX; cefoxitin, FOX; cefoperazone, CFP; **fluoroquinolones**: ciprofloxacin, CIP; moxifloxacin, MXF; **macrolides**: erythromycin, E; **lincosamides**: clindamycin, DA; **aminoglycosides**: gentamicin, CN; amikacin, AK; **folate inhibitors**: co-trimoxazole, SXT; **fucidanes**, fusidic acid, FD; **tetracyclines**: tetracycline, TE; doxycycline, DO; minocycline, MH; **glycylcyclines**: tigecycline, TGC; **phenicols**: chloramphenicol, C; **monocarboxylic acid**: mupirocin, MUP; **ansamycins**: rifampin, RD; **aminocoumarin**: novobiocin, NV; **glycopeptides**: vancomycin, VA; teicoplanin, TEC; **oxazolidinones**: linezolid, LZD; **phosphonic acids**: fosfomycin, FOT; **stretogramins**: quinupristin-dalfopristin, QD; **anti-MRSA cephalosporins**: ceftaroline, CPT. **MLS<sub>B</sub> phenotypes**: inducible (I), iMLSB; constitutive (C), cMLSB; macrolide-streptogramin, MS. MDR, multidrug resistance (resistance  $\geq$  3 classes of antimicrobials).

Supplementary Table S1

| Strain code | Year of isolation / Source of strain | Clonal Complex (CC) | Strain accession no. | Chromosome coverage (average) | Resistance phenotype*                                          | Plasmid name        | Size of plasmid in bp | Plasmid accession no. | Plasmid coverage (average) | Replicon type (Conserved domain) | Mobility mechanism(s)             | Antimicrobial resistance determinant(s) |
|-------------|--------------------------------------|---------------------|----------------------|-------------------------------|----------------------------------------------------------------|---------------------|-----------------------|-----------------------|----------------------------|----------------------------------|-----------------------------------|-----------------------------------------|
| SauR60      | 2016 / pus                           | CC22                | JAIUDS010000000      | 366.8                         | FOX, OX, P, CFP, CIP, MXF, E, DA; MDR (4 classes); iMLSB       | pSauR60-1           | 35,355                | JAIUDS010000028.1     | 1340.9                     | rep20 (RepA_N) + rep5a (Rep_3)   | Mob/pre (MOBV)                    | none                                    |
|             |                                      |                     |                      |                               |                                                                | pSauR60-2           | 3,050                 | JAIUDS010000047.1     | 6320.3                     | rep21 (Rep_1)                    | pWBG749 oriT-OT49 mimic + rep-rlx | none                                    |
|             |                                      |                     |                      |                               |                                                                | pSauR60-3           | 2,528                 | JAIUDS010000048.1     | 4654.7                     | rep10 (RepL)                     | none                              | ermC                                    |
| SauR63      | 2016 / pus                           | CC22                | JAIUEA010000000      | 373.0                         | FOX, OX, P, CFP, CIP, MXF, E, DA; MDR (4 classes); cMLSB       | pSauR63-1           | 35,336                | JAIUEA010000032.1     | 1267.5                     | rep20 (RepA_N) + rep5a (Rep_3)   | Mob/pre (MOBV)                    | none                                    |
|             |                                      |                     |                      |                               |                                                                | pSauR63-2           | 3,050                 | JAIUEA010000049.1     | 7726.7                     | rep21 (Rep_1)                    | pWBG749 oriT-OT49 mimic + rep-rlx | none                                    |
|             |                                      |                     |                      |                               |                                                                | pSauR63-3           | 2,422                 | JAIUEA010000050.1     | 7574.0                     | rep10 (RepL)                     | none                              | ermC                                    |
| SauR66      | 2016 / blood                         | CC22                | JAHMGI000000000      | 686.2                         | FOX, OX, P, CFP, CIP, MXF, E, DA; MDR (4 classes); iMLSB       | pSauR66-1           | 35,337                | JAHMGI010000020.1     | 2346.6                     | rep20 (RepA_N) + rep5a (Rep_3)   | Mob/pre (MOBV)                    | none                                    |
|             |                                      |                     |                      |                               |                                                                | pSauR66-2           | 3,138                 | JAHMGI010000024.1     | 7723.5                     | rep21 (Rep_1)                    | pWBG749 oriT-OT49 mimic + rep-rlx | none                                    |
|             |                                      |                     |                      |                               |                                                                | pSauR66-3           | 2,600                 | JAHMGI010000026.1     | 7745.7                     | rep10 (RepL)                     | none                              | ermC                                    |
| SauR68      | 2016 / blood                         | CC1                 | JAHMKB000000000      | 442.5                         | FOX, OX, P, CFP, CIP, MXF, E, CN, AK, SXT; MDR (5 classes); MS | No plasmid detected | -                     | -                     | NA                         | -                                | -                                 | -                                       |
| SauR69      | 2016/ pus                            | CC22                | JAIXGZ000000000      | 332.3                         | FOX, OX, P, CFP, CIP, MXF, E, DA; MDR (4 classes); iMLSB       | pSauR69-1           | 3,011                 | JAIXGZ010000031.1     | 6125.8                     | rep21 (Rep_1)                    | pWBG749 oriT-OT49 mimic + rep-rlx | none                                    |
|             |                                      |                     |                      |                               |                                                                | pSauR69-2           | 2,473                 | JAIXGZ010000033.1     | 5260.5                     | rep10 (RepL)                     | none                              | ermC                                    |
| SauR72      | 2016/ pus                            | CC22                | JAIXHA000000000      | 388.0                         | FOX, OX, P, CFP, CIP, MXF, E, DA; MDR (4 classes); iMLSB       | pSauR72-1           | 3,011                 | JAIXHA010000026.1     | 7708.4                     | rep21 (Rep_1)                    | pWBG749 oriT-OT49 mimic + rep-rlx | none                                    |
|             |                                      |                     |                      |                               |                                                                | pSauR72-2           | 2,473                 | JAIXHA010000029.1     | 7251.8                     | rep10 (RepL)                     | none                              | ermC                                    |
| SauR73      | 2016/ pus                            | CC22                | JAIXHB000000000      | 381.6                         | FOX, OX, P, CFP, CIP, MXF, E, DA; MDR (4 classes); iMLSB       | pSauR73-1           | 3,011                 | JAIXHB010000032.1     | 7682.1                     | rep21 (Rep_1)                    | pWBG749 oriT-OT49 mimic + rep-rlx | none                                    |
|             |                                      |                     |                      |                               |                                                                | pSauR73-2           | 2,473                 | JAIXHB010000034.1     | 7016.0                     | rep10 (RepL)                     | none                              | ermC                                    |

\*Abbreviations used:  **$\beta$ -lactams**: penicillin, P; oxacillin, OX; cefoxitin, FOX; cefoperazone, CFP; **fluoroquinolones**: ciprofloxacin, CIP; moxifloxacin, MXF; **macrolides**: erythromycin, E; **lincosamides**: clindamycin, DA; **aminoglycosides**: gentamicin, CN; amikacin, AK; **folate inhibitors**: co-trimoxazole, SXT; **fucidan**, fusidic acid, FD; **tetracyclines**: tetracycline, TE; doxycycline, DO; minocycline, MH; **glycylcyclines**: tigecycline, TGC; **phenicols**: chloramphenicol, C; **monocarboxylic acid**: mupirocin, MUP; **ansamycins**: rifampin, RD; **aminocoumarin**: novobiocin, NV; **glycopeptides**: vancomycin, VA; teicoplanin, TEC; **oxazolidinones**: linezolid, LZD; **phosphonic acids**: fosfomicin, FOT; **streptogramins**: quinupristin-dalfopristin, QD; **anti-MRSA cephalosporins**: ceftaroline, CPT. **MLS<sub>B</sub> phenotypes**: inducible (I), iMLSB; constitutive (C), cMLSB; macrolide-streptogramin, MS. MDR, multidrug resistance (resistance  $\geq$  3 classes of antimicrobials).

Supplementary Table S1

| Strain code | Year of isolation / Source of strain | Clonal Complex (CC) | Strain accession no. | Chromosome coverage (average) | Resistance phenotype*                                                                     | Plasmid name | Size of plasmid in bp | Plasmid accession no. | Plasmid coverage (average) | Replicon type (Conserved domain) | Mobility mechanism(s)                                  | Antimicrobial resistance determinant(s) |
|-------------|--------------------------------------|---------------------|----------------------|-------------------------------|-------------------------------------------------------------------------------------------|--------------|-----------------------|-----------------------|----------------------------|----------------------------------|--------------------------------------------------------|-----------------------------------------|
| SauR74      | 2016/ pus                            | CC22                | JAHMKC000000000      | 490.2                         | FOX, OX, P, CFP, CIP, MXF, E, DA, TGC; MDR (5 classes); iMLSB                             | pSauR74-1    | 3,011                 | JAHMKC010000030.1     | 7647.4                     | rep21 (Rep_1)                    | pWBG749 oriT-OT49 mimic + rep-rlx                      | none                                    |
|             |                                      |                     |                      |                               |                                                                                           | pSauR74-2    | 2,473                 | JAHMKC010000033.1     | 7508.6                     | rep10 (RepL)                     | none                                                   | ermC                                    |
| SauR76      | 2016/ blood                          | CC8                 | JAHMKD000000000      | 357.3                         | FOX, OX, P, CFP, CIP, MXF, E, DA, CN, AK, SXT, FD, TE, DO, MH, RD; MDR (9 classes); cMLSB | pSauR76-1    | 27,579                | JAHMKD010000027.1     | 1281.0                     | rep20 (RepA_N) + rep21 (Rep_1)   | pWBG749 oriT-OTUNa & pWBG749 oriT-OT49 mimic + rep-rlx | none                                    |
|             |                                      |                     |                      |                               |                                                                                           | pSauR76-2    | 4,459                 | JAHMKD010000042.1     | 3378.7                     | rep7a (Rep_trans)                | Mob/pre (MOBV)                                         | tetK                                    |
| SauR77      | 2016/ blood                          | CC22                | JAHMGJ000000000      | 660.8                         | FOX, OX, P, CFP, CIP, MXF, E, DA; MDR (4 classes); iMLSB                                  | pSauR77-1    | 35,618                | JAHMGJ010000029.1     | 2068.3                     | rep20 (RepA_N) + rep5a (Rep_3)   | Mob/pre (MOBV)                                         | None                                    |
|             |                                      |                     |                      |                               |                                                                                           | pSauR77-2    | 2,550                 | JAHMGJ010000039.1     | 7437.6                     | rep10 (RepL)                     | none                                                   | ermC                                    |
| SauR78      | 2016/ pus                            | CC22                | JAIUDT010000000      | 376.6                         | FOX, OX, P, CFP, CIP, MXF, E, DA; MDR (4 classes); iMLSB                                  | pSauR78-1    | 35,336                | JAIUDT010000029.1     | 1201.6                     | rep20 (RepA_N) + rep5a (Rep_3)   | Mob/pre (MOBV)                                         | none                                    |
|             |                                      |                     |                      |                               |                                                                                           | pSauR78-2    | 2,528                 | JAIUDT010000049.1     | 5436.3                     | rep10 (RepL)                     | none                                                   | ermC                                    |
| SauR81      | 2017/ blood                          | CC22                | JAHMGK000000000      | 686.8                         | FOX, OX, P, CFP, CIP, MXF, E, DA; MDR (4 classes); iMLSB                                  | pSauR81-1    | 36,054                | JAHMGK010000024.1     | 2603.9                     | rep20 (RepA_N) + rep5a (Rep_3)   | Mob/pre (MOBV)                                         | none                                    |
|             |                                      |                     |                      |                               |                                                                                           | pSauR81-2    | 3,088                 | JAHMGK010000033.1     | 7672.6                     | rep21 (Rep_1)                    | pWBG749 oriT-OT49 mimic + rep-rlx                      | none                                    |
|             |                                      |                     |                      |                               |                                                                                           | pSauR81-3    | 2,550                 | JAHMGK010000035.1     | 7698.4                     | rep10 (RepL)                     | none                                                   | ermC                                    |
| SauR82      | 2017/ blood                          | CC22                | JAHMGL000000000      | 723.3                         | FOX, OX, P, CFP, CIP, MXF, E, DA; MDR (4 classes); iMLSB                                  | pSauR82-1    | 35,415                | JAHMGL010000026.1     | 3049.3                     | rep20 (RepA_N) + rep5a (Rep_3)   | Mob/pre (MOBV)                                         | none                                    |
|             |                                      |                     |                      |                               |                                                                                           | pSauR82-2    | 3,088                 | JAHMGL010000034.1     | 7772.7                     | rep21 (Rep_1)                    | pWBG749 oriT-OT49 mimic + rep-rlx                      | none                                    |
|             |                                      |                     |                      |                               |                                                                                           | pSauR82-3    | 2,550                 | JAHMGL010000036.1     | 7751.0                     | rep10 (RepL)                     | none                                                   | ermC                                    |
| SauR83      | 2017/ blood                          | CC22                | JAHMGM000000000      | 576.1                         | FOX, OX, P, CFP, CIP, MXF, E, DA; MDR (4 classes); iMLSB                                  | pSauR83-1    | 3,011                 | JAHMGM010000026.1     | 7667.3                     | rep21 (Rep_1)                    | pWBG749 oriT-OT49 mimic + rep-rlx                      | none                                    |
|             |                                      |                     |                      |                               |                                                                                           | pSauR83-2    | 2,473                 | JAHMGM010000028.1     | 7615.8                     | rep10 (RepL)                     | none                                                   | ermC                                    |

\*Abbreviations used:  **$\beta$ -lactams**: penicillin, P; oxacillin, OX; cefoxitin, FOX; cefoperazone, CFP; **fluoroquinolones**: ciprofloxacin, CIP; moxifloxacin, MXF; **macrolides**: erythromycin, E; **lincosamides**: clindamycin, DA; **aminoglycosides**: gentamicin, CN; amikacin, AK; **folate inhibitors**: co-trimoxazole, SXT; **fucidanes**, fusidic acid, FD; **tetracyclines**: tetracycline, TE; doxycycline, DO; minocycline, MH; **glycylcyclines**: tigecycline, TGC; **phenicols**: chloramphenicol, C; **monocarboxylic acid**: mupirocin, MUP; **ansamycins**: rifampin, RD; **aminocoumarin**: novobiocin, NV; **glycopeptides**: vancomycin, VA; teicoplanin, TEC; **oxazolidinones**: linezolid, LZD; **phosphonic acids**: fosfomicin, FOT; **stretogramins**: quinupristin-dalfopristin, QD; **anti-MRSA cephalosporins**: ceftaroline, CPT. **MLS<sub>B</sub> phenotypes**: inducible (I), iMLSB; constitutive (C), cMLSB; macrolide-streptogramin, MS. MDR, multidrug resistance (resistance  $\geq$  3 classes of antimicrobials).

Supplementary Table S1

| Strain code | Year of isolation / Source of strain | Clonal Complex (CC) | Strain accession no. | Chromosome coverage (average) | Resistance phenotype*                                         | Plasmid name | Size of plasmid in bp | Plasmid accession no. | Plasmid coverage (average) | Replicon type (Conserved domain)               | Mobility mechanism(s)                              | Antimicrobial resistance determinant(s) |
|-------------|--------------------------------------|---------------------|----------------------|-------------------------------|---------------------------------------------------------------|--------------|-----------------------|-----------------------|----------------------------|------------------------------------------------|----------------------------------------------------|-----------------------------------------|
| SauR84      | 2017/ blood                          | CC22                | JAHMGN000000000      | 534.6                         | FOX, OX, P, CFP, CIP, MXF, E, DA, C; MDR (5 classes); iMLSB   | pSauR84-1    | 3,733                 | JAHMGN010000028.1     | 7666.6                     | rep7a (Rep_trans)                              | Mob/pre (MOBV)                                     | cat                                     |
|             |                                      |                     |                      |                               |                                                               | pSauR84-2    | 3,011                 | JAHMGN010000032.1     | 7671.6                     | rep21 (Rep_1)                                  | pWBG749 oriT-OT49 mimic + rep-rlx                  | none                                    |
|             |                                      |                     |                      |                               |                                                               | pSauR84-3    | 2,473                 | JAHMGN010000034.1     | 7627.6                     | rep10 (RepL)                                   | none                                               | ermC                                    |
| SauR85      | 2017/ blood                          | CC22                | JAHMKE000000000      | 471.7                         | FOX, OX, P, CFP, CIP, MXF, E, DA, C; MDR (5 classes); iMLSB   | pSauR85-1    | 3,733                 | JAHMKE010000028.1     | 7716.7                     | rep7a (Rep_trans)                              | Mob/pre (MOBV)                                     | cat                                     |
|             |                                      |                     |                      |                               |                                                               | pSauR85-2    | 3,011                 | JAHMKE010000032.1     | 7654.4                     | rep21 (Rep_1)                                  | pWBG749 oriT-OT49 mimic + rep-rlx                  | none                                    |
|             |                                      |                     |                      |                               |                                                               | pSauR85-3    | 2,473                 | JAHMKE010000034.1     | 7711.9                     | rep10 (RepL)                                   | none                                               | ermC                                    |
| SauR86      | 2017/ blood                          | CC22                | JAHMGT000000000      | 585.7                         | FOX, OX, P, CFP, CIP, MXF, E, DA; MDR (4 classes); iMLSB      | pSauR86-1    | 35,640                | JAHMGT010000022.1     | 2616.5                     | rep20 (RepA_N) + rep5a (Rep_3)                 | Mob/pre (MOBV)                                     | none                                    |
|             |                                      |                     |                      |                               |                                                               | pSauR86-2    | 3,138                 | JAHMGT010000029.1     | 7665.6                     | rep21 (Rep_1)                                  | pWBG749 oriT-OT49 mimic + rep-rlx                  | none                                    |
|             |                                      |                     |                      |                               |                                                               | pSauR86-3    | 2,600                 | JAHMGT010000031.1     | 7724.8                     | rep10 (RepL)                                   | none                                               | ermC                                    |
| SauR88      | 2017/ pus                            | CC22                | JAHMKF000000000      | 402.8                         | FOX, OX, P, CFP, CIP, MXF, E, DA, TGC; MDR (5 classes); iMLSB | pSauR88-1    | 3,011                 | JAHMKF010000027.1     | 7655.3                     | rep21 (Rep_1)                                  | pWBG749 oriT-OT49 mimic + rep-rlx                  | none                                    |
|             |                                      |                     |                      |                               |                                                               | pSauR88-2    | 2,473                 | JAHMKF010000029.1     | 7589.2                     | rep10 (RepL)                                   | none                                               | ermC                                    |
| SauR90      | 2017/ blood                          | CC22                | JAIVEI000000000      | 660.3                         | FOX, OX, P, E, CN; MDR (3 classes); MS                        | pSauR90      | 22,435                | JAIVEI020000038       | 728.5                      | rep19 (RepA_N) rep20 (RepA_N) + Δrep21 (Rep_1) | pWBG749 oriT-OT49 mimic & pWBG749 oriT-OTUNa mimic | none                                    |
| SauR91      | 2017/ respiratory                    | CC22                | JAHMGR000000000      | 529.7                         | FOX, OX, P, CFP, CIP, MXF, E, DA; MDR (4 classes); iMLSB      | pSauR91-1    | 35,640                | JAHMGR010000023.1     | 2140.9                     | rep20 (RepA_N) + rep5a (Rep_3)                 | Mob/pre (MOBV)                                     | none                                    |
|             |                                      |                     |                      |                               |                                                               | pSauR91-2    | 3,138                 | JAHMGR010000027.1     | 7676.2                     | rep21 (Rep_1)                                  | pWBG749 oriT-OT49 mimic + rep-rlx                  | none                                    |
| SauR92      | 2017/ respiratory                    | CC22                | JAHMGS000000000      | 570.4                         | FOX, OX, P, CFP, CIP, MXF, E, DA; MDR (4 classes); iMLSB      | pSauR92-1    | 35,337                | JAHMGS010000022.1     | 1742.0                     | rep20 (RepA_N) + rep5a (Rep_3)                 | Mob/pre (MOBV)                                     | none                                    |
|             |                                      |                     |                      |                               |                                                               | pSauR92-2    | 3,138                 | JAHMGS010000028.1     | 7563.9                     | rep21 (Rep_1)                                  | pWBG749 oriT-OT49 mimic + rep-rlx                  | none                                    |
|             |                                      |                     |                      |                               |                                                               | pSauR92-3    | 2,600                 | JAHMGS010000031.1     | 7512.0                     | rep10 (RepL)                                   | none                                               | ermC                                    |

\*Abbreviations used: **β-lactams**: penicillin, P; oxacillin, OX; cefoxitin, FOX; cefoperazone, CFP; **fluoroquinolones**: ciprofloxacin, CIP; moxifloxacin, MXF; **macrolides**: erythromycin, E; **lincosamides**: clindamycin, DA; **aminoglycosides**: gentamicin, CN; amikacin, AK; **folate inhibitors**: co-trimoxazole, SXT; **fucidanes**, fusidic acid, FD; **tetracyclines**: tetracycline, TE; doxycycline, DO; minocycline, MH; **glycylcyclines**: tigecycline, TGC; **phenicols**: chloramphenicol, C; **monocarboxylic acid**: mupirocin, MUP; **ansamycins**: rifampin, RD; **aminocoumarin**: novobiocin, NV; **glycopeptides**: vancomycin, VA; teicoplanin, TEC; **oxazolidinones**: linezolid, LZD; **phosphonic acids**: fosfomicin, FOT; **streptogramins**: quinupristin-dalfopristin, QD; **anti-MRSA cephalosporins**: ceftaroline, CPT. **MLS<sub>B</sub> phenotypes**: inducible (I), iMLSB; constitutive (C), cMLSB; macrolide-streptogramin, MS. MDR, multidrug resistance (resistance ≥ 3 classes of antimicrobials).

Supplementary Table S1

| Strain code | Year of isolation / Source of strain | Clonal Complex (CC) | Strain accession no. | Chromosome coverage (average) | Resistance phenotype*                                         | Plasmid name | Size of plasmid in bp | Plasmid accession no. | Plasmid coverage (average) | Replicon type (Conserved domain)              | Mobility mechanism(s)             | Antimicrobial resistance determinant(s) |
|-------------|--------------------------------------|---------------------|----------------------|-------------------------------|---------------------------------------------------------------|--------------|-----------------------|-----------------------|----------------------------|-----------------------------------------------|-----------------------------------|-----------------------------------------|
| SauR93      | 2017/ blood                          | CC22                | JAHMGO000000000      | 740.8                         | FOX, OX, P, CFP, CIP, MXF, E, DA; MDR (4 classes); cMLSB      | pSauR93-1    | 35,237                | JAHMGO010000024.1     | 2726.3                     | rep20 (RepA_N) + rep5a (Rep_3)                | Mob/pre (MOBV)                    | none                                    |
|             |                                      |                     |                      |                               |                                                               | pSauR93-2    | 3,088                 | JAHMGO010000032.1     | 7685.4                     | rep21 (Rep_1)                                 | pWBG749 oriT-OT49 mimic + rep-rlx | none                                    |
|             |                                      |                     |                      |                               |                                                               | pSauR93-3    | 2,444                 | JAHMGO010000035.1     | 7601.2                     | rep10 (RepL)                                  | none                              | ermC                                    |
| SauR103     | 2017/ pus                            | CC22                | JAHMKG000000000      | 501.4                         | FOX, OX, P, CFP, CIP, MXF, E, DA, TGC; MDR (5 classes); iMLSB | pSauR103-1   | 35,337                | JAHMKG010000020.1     | 1737.6                     | rep20 (RepA_N) + rep5a (Rep_3)                | Mob/pre (MOBV)                    | none                                    |
|             |                                      |                     |                      |                               |                                                               | pSauR103-2   | 2,600                 | JAHMKG010000025.1     | 7613.9                     | rep10 (RepL)                                  | none                              | ermC                                    |
| SauR105     | 2017/ blood                          | CC22                | JAHMGP000000000      | 655.4                         | FOX, OX, P, CFP, CIP, MXF, E, DA; MDR (4 classes); cMLSB      | pSauR105-1   | 35,656                | JAHMGP010000027.1     | 2435.7                     | rep20 (RepA_N) + rep5a (Rep_3)                | Mob/pre (MOBV)                    | none                                    |
|             |                                      |                     |                      |                               |                                                               | pSauR105-2   | 3,088                 | JAHMGP010000042.1     | 7694.5                     | rep21 (Rep_1)                                 | pWBG749 oriT-OT49 mimic + rep-rlx | none                                    |
|             |                                      |                     |                      |                               |                                                               | pSauR105-3   | 2,444                 | JAHMGP010000044.1     | 7599.2                     | rep10 (RepL)                                  | none                              | ermC                                    |
| SauR106     | 2017/ blood                          | CC22                | JAHMGQ000000000      | 540.8                         | FOX, OX, P, CFP, CIP, MXF, E, DA; MDR (4 classes); iMLSB      | pSauR106-1   | 35,316                | JAHMGQ010000025.1     | 2018.3                     | rep20 (RepA_N) + rep5a (Rep_3)                | Mob/pre (MOBV)                    | none                                    |
|             |                                      |                     |                      |                               |                                                               | pSauR106-2   | 3,088                 | JAHMGQ010000037.1     | 7742.8                     | rep21 (Rep_1)                                 | pWBG749 oriT-OT49 mimic + rep-rlx | none                                    |
|             |                                      |                     |                      |                               |                                                               | pSauR106-3   | 2,550                 | JAHMGQ010000038.1     | 7751.3                     | rep10 (RepL)                                  | none                              | ermC                                    |
| SauR118     | 2017/ pus                            | CC22                | JAHMKH000000000      | 483.0                         | FOX, OX, P, CFP, CIP, MXF, E, DA, TGC; MDR (5 classes); iMLSB | pSauR118-1   | 35,337                | JAHMKH010000021.1     | 1540.3                     | rep20 (RepA_N) + rep5a (Rep_3)                | Mob/pre (MOBV)                    | none                                    |
|             |                                      |                     |                      |                               |                                                               | pSauR118-2   | 3,138                 | JAHMKH010000025.1     | 7665.4                     | rep21 (Rep_1)                                 | pWBG749 oriT-OT49 mimic + rep-rlx | none                                    |
|             |                                      |                     |                      |                               |                                                               | pSauR118-3   | 2,600                 | JAHMKH010000027.1     | 7563.6                     | rep10 (RepL)                                  | none                              | ermC                                    |
| SauR127     | 2017/ pus                            | CC1                 | JAIVEJ000000000      | 406.1                         | FOX, OX, P, FD, CN, AK, TE, DO, TGC; MDR (5 classes)          | pSauR127     | 25,167                | JAIVEJ010000022.1     | 2207.0                     | rep5a (Rep_3) + Δrep22 (Rep_1) Δrep13 (Rep_1) | Mob/pre (MOBV)                    | bla operon + tetL                       |

\*Abbreviations used: **β-lactams**: penicillin, P; oxacillin, OX; cefoxitin, FOX; cefoperazone, CFP; **fluoroquinolones**: ciprofloxacin, CIP; moxifloxacin, MXF; **macrolides**: erythromycin, E; **lincosamides**: clindamycin, DA; **aminoglycosides**: gentamicin, CN; amikacin, AK; **folate inhibitors**: co-trimoxazole, SXT; **fucidan**, fusidic acid, FD; **tetracyclines**: tetracycline, TE; doxycycline, DO; minocycline, MH; **glycylcyclines**: tigecycline, TGC; **phenicols**: chloramphenicol, C; **monocarboxylic acid**: mupirocin, MUP; **ansamycins**: rifampin, RD; **aminocoumarin**: novobiocin, NV; **glycopeptides**: vancomycin, VA; teicoplanin, TEC; **oxazolidinones**: linezolid, LZD; **phosphonic acids**: fosfomicin, FOT; **stretogramins**: quinupristin-dalfopristin, QD; **anti-MRSA cephalosporins**: ceftaroline, CPT. **MLS<sub>B</sub> phenotypes**: inducible (I), iMLSB; constitutive (C), cMLSB; macrolide-streptogramin, MS. MDR, multidrug resistance (resistance ≥ 3 classes of antimicrobials).

Supplementary Table S1

| Strain code | Year of isolation / Source of strain | Clonal Complex (CC) | Strain accession no. | Chromosome coverage (average) | Resistance phenotype*                                                       | Plasmid name | Size of plasmid in bp | Plasmid accession no. | Plasmid coverage (average) | Replicon type (Conserved domain) | Mobility mechanism(s)             | Antimicrobial resistance determinant(s) |
|-------------|--------------------------------------|---------------------|----------------------|-------------------------------|-----------------------------------------------------------------------------|--------------|-----------------------|-----------------------|----------------------------|----------------------------------|-----------------------------------|-----------------------------------------|
| SauR133     | 2017/ blood                          | CC22                | JAHMGU000000000      | 382.4                         | FOX, OX, P, CFP, CIP, MXF, E, DA; MDR (4 classes); iMLSB                    | pSauR133-1   | 34,958                | JAHMGU010000031.1     | 1775.2                     | rep20 (RepA_N) + rep5a (Rep_3)   | Mob/pre (MOBV)                    | none                                    |
|             |                                      |                     |                      |                               |                                                                             | pSauR133-2   | 3,050                 | JAHMGU010000048.1     | 1428.5                     | rep21 (Rep_1)                    | pWBG749 oriT-OT49 mimic + rep-rlx | none                                    |
|             |                                      |                     |                      |                               |                                                                             | pSauR133-3   | 2,518                 | JAHMGU010000049.1     | 1101.6                     | rep10 (RepL)                     | none                              | ermC                                    |
| SauR142     | 2017/ respiratory                    | CC22                | JAHMGV000000000      | 382.4                         | FOX, OX, P, CFP, CIP, MXF, E, DA; MDR (4 classes); iMLSB                    | pSauR142-1   | 35,604                | JAHMGV010000031.1     | 1775.2                     | rep20 (RepA_N) + rep5a (Rep_3)   | Mob/pre (MOBV)                    | none                                    |
|             |                                      |                     |                      |                               |                                                                             | pSauR142-2   | 3,050                 | JAHMGV010000048.1     | 1428.5                     | rep21 (Rep_1)                    | pWBG749 oriT-OT49 mimic + rep-rlx | none                                    |
|             |                                      |                     |                      |                               |                                                                             | pSauR142-3   | 2,518                 | JAHMGV010000049.1     | 1101.6                     | rep10 (RepL)                     | none                              | ermC                                    |
| SauR143     | 2017/ blood                          | CC22                | JAHMGW000000000      | 393.6                         | FOX, OX, P, CFP, CIP, MXF, E, DA; MDR (4 classes); iMLSB                    | pSauR143-1   | 35,674                | JAHMGW010000027.1     | 1817.9                     | rep20 (RepA_N) + rep5a (Rep_3)   | Mob/pre (MOBV)                    | none                                    |
|             |                                      |                     |                      |                               |                                                                             | pSauR143-2   | 3,050                 | JAHMGW010000046.1     | 2002.6                     | rep21 (Rep_1)                    | pWBG749 oriT-OT49 mimic + rep-rlx | none                                    |
|             |                                      |                     |                      |                               |                                                                             | pSauR143-3   | 2,528                 | JAHMGW010000047.1     | 1814.6                     | rep10 (RepL)                     | none                              | ermC                                    |
| SauR144     | 2017/ blood                          | CC22                | JAHMGX000000000      | 393.6                         | FOX, OX, P, CFP, CIP, MXF, E, DA; MDR (4 classes); iMLSB                    | pSauR144-1   | 35,332                | JAHMGX010000027.1     | 1817.9                     | rep20 (RepA_N) + rep5a (Rep_3)   | Mob/pre (MOBV)                    | none                                    |
|             |                                      |                     |                      |                               |                                                                             | pSauR144-2   | 3,050                 | JAHMGX010000046.1     | 2002.6                     | rep21 (Rep_1)                    | pWBG749 oriT-OT49 mimic + rep-rlx | none                                    |
|             |                                      |                     |                      |                               |                                                                             | pSauR144-3   | 2,528                 | JAHMGX010000047.1     | 1814.6                     | rep10 (RepL)                     | none                              | ermC                                    |
| SauR156     | 2017/ pus                            | CC1                 | JAIUJG000000000      | 365.7                         | FOX, OX, P, DA, E, SXT, CN, AK, TE, DO, CIP, MXF, C; MDR (8 classes); cMLSB | pSauR156-1   | 11341                 | JAIUJG010000020.1     | 1507.3                     | repUS18 (PriCT-1)                | Mob/pre (MOBV) (2 copies)         | ermB, tetL ant(4')-Ib                   |
|             |                                      |                     |                      |                               |                                                                             | pSauR156-2   | 3,010                 | JAIUJG010000029.1     | 2056.9                     | rep13 (Rep_1)                    | rep-rlx                           | none                                    |
|             |                                      |                     |                      |                               |                                                                             | pSauR156-3   | 2,886                 | JAIUJG010000031       | 1368.4                     | rep21 (Rep_1)                    | rep-rlx                           | none                                    |
| SauR157     | 2017/ pus                            | CC22                | JAHMGY000000000      | 377.2                         | FOX, OX, P, CFP, CIP, MXF, E, DA, FD; MDR (5 classes); iMLSB                | pSauR157-1   | 3,011                 | JAHMGY010000028.1     | 1919.6                     | rep21 (Rep_1)                    | pWBG749 oriT-OT49 mimic + rep-rlx | none                                    |
|             |                                      |                     |                      |                               |                                                                             | pSauR157-2   | 2,473                 | JAHMGY010000030.1     | 1332.0                     | rep10 (RepL)                     | none                              | ermC                                    |

\*Abbreviations used:  **$\beta$ -lactams**: penicillin, P; oxacillin, OX; cefoxitin, FOX; cefoperazone, CFP; **fluoroquinolones**: ciprofloxacin, CIP; moxifloxacin, MXF; **macrolides**: erythromycin, E; **lincosamides**: clindamycin, DA; **aminoglycosides**: gentamicin, CN; amikacin, AK; **folate inhibitors**: co-trimoxazole, SXT; **fucidanes**, fusidic acid, FD; **tetracyclines**: tetracycline, TE; doxycycline, DO; minocycline, MH; **glycylcyclines**: tigecycline, TGC; **phenicols**: chloramphenicol, C; **monocarboxylic acid**: mupirocin, MUP; **ansamycins**: rifampin, RD; **aminocoumarin**: novobiocin, NV; **glycopeptides**: vancomycin, VA; teicoplanin, TEC; **oxazolidinones**: linezolid, LZD; **phosphonic acids**: fosfomicin, FOT; **streptogramins**: quinupristin-dalfopristin, QD; **anti-MRSA cephalosporins**: ceftaroline, CPT. **MLS<sub>B</sub> phenotypes**: inducible (I), iMLSB; constitutive (C), cMLSB; macrolide-streptogramin, MS. MDR, multidrug resistance (resistance  $\geq$  3 classes of antimicrobials).



Supplementary Table S1

| Strain code | Year of isolation / Source of strain | Clonal Complex (CC) | Strain accession no. | Chromosome coverage (average) | Resistance phenotype*                                                   | Plasmid name | Size of plasmid in bp | Plasmid accession no. | Plasmid coverage (average) | Replicon type (Conserved domain)                                                        | Mobility mechanism(s)                              | Antimicrobial resistance determinant(s)           |
|-------------|--------------------------------------|---------------------|----------------------|-------------------------------|-------------------------------------------------------------------------|--------------|-----------------------|-----------------------|----------------------------|-----------------------------------------------------------------------------------------|----------------------------------------------------|---------------------------------------------------|
| SauR165     | 2017/ blood                          | CC22                | JAHMGZ000000000      | 349.5                         | FOX, OX, P, CFP, CIP, MXF, E, DA, AK, CN, TE, C; MDR (7 classes); iMLSB | pSauR165-1   | 28,649                | JAHMGZ010000022.1     | 1021.6                     | rep7a(Rep_trans) + rep20 (RepA_N) + ΔrepUS22 (ΔRep_1) + Δrep22(ΔRep_1) + Δrep13(ΔRep_1) | Mob/pre (MOBV)                                     | tetK, lnuA, cat aac(6')-Ie-aph(2'')-Ia ant(4')-Ib |
|             |                                      |                     |                      |                               |                                                                         | pSauR165-2   | 3,011                 | JAHMGZ010000027.1     | 3360.1                     | rep21 (Rep_1)                                                                           | pWBG749 oriT-OT49 mimic + rep-rlx                  | none                                              |
|             |                                      |                     |                      |                               |                                                                         | pSauR165-3   | 2,473                 | JAHMGZ010000029.1     | 3274.1                     | rep10 (RepL)                                                                            | none                                               | ermC                                              |
| SauR168     | 2017/ pus                            | CC1                 | JAHMHA000000000      | 361.0                         | FOX, OX, P, CFP, CIP, MXF, E, DA, CN, FD; MDR (6 classes); iMLSB        | pSauR168-1   | 20,652                | JAHMHA010000015.1     | 867.8                      | rep5a (rep_3)                                                                           | Mob/pre (MOBV)                                     | bla operon                                        |
|             |                                      |                     |                      |                               |                                                                         | pSauR168-2   | 2,473                 | JAHMHA010000020.1     | 3154.9                     | rep10 (RepL)                                                                            | none                                               | ermC                                              |
| SauR169     | 2017/ pus                            | CC1                 | JAIVEK000000000      | 376.1                         | FOX, P, E, CN, FD, NV; MDR (5 classes); MS                              | pSauR169     | 22,490                | JAIVEK020000054       | 970.3                      | rep19 (RepA_N) + rep20 (RepA_N) Δrep21 (rep_1)                                          | pWBG749 oriT-OT49 mimic & pWBG749 oriT-OTUNa mimic | none                                              |
| SauR171     | 2017/ pus                            | CC22                | JAHMHB000000000      | 364.2                         | FOX, OX, P, CIP, MXF, E, DA, FD. MDR (5 classes); iMLSB                 | pSauR171-1   | 3,011                 | JAHMHB010000026.1     | 1915.5                     | rep21 (Rep_1)                                                                           | pWBG749 oriT-OT49 mimic + rep-rlx                  | none                                              |
|             |                                      |                     |                      |                               |                                                                         | pSauR171-2   | 2,473                 | JAHMHB010000028.1     | 1362.5                     | rep10 (RepL)                                                                            | none                                               | ermC                                              |
| SauR176     | 2017/ respiratory                    | CC22                | JAHMHC000000000      | 377.4                         | FOX, OX, P, CIP, E, DA. MDR (4 classes); iMLSB                          | pSauR176-1   | 3,011                 | JAHMHC010000031.1     | 1003.7                     | rep21 (Rep_1)                                                                           | pWBG749 oriT-OT49 mimic + rep-rlx                  | none                                              |
|             |                                      |                     |                      |                               |                                                                         | pSauR176-2   | 2,463                 | JAHMHC010000033.1     | 1597.7                     | rep10 (RepL)                                                                            | none                                               | ermC                                              |
|             |                                      |                     |                      |                               |                                                                         | pSauR176-3   | 2,397                 | JAHMHC010000034.1     | 1244.6                     | repUS21 (Rep_1)                                                                         | rep-rlx                                            | none                                              |
| SauR181     | 2018/ pus                            | CC22                | JAHMHD000000000      | 369.0                         | FOX, OX, P, CIP, MXF, E, DA, FD; MDR (5 classes); iMLSB                 | pSauR181-1   | 35,356                | JAHMHD010000029.1     | 1754.0                     | rep20 (RepA_N) + rep5a (Rep_3)                                                          | Mob/pre (MOBV)                                     | none                                              |
|             |                                      |                     |                      |                               |                                                                         | pSauR181-2   | 3,050                 | JAHMHD010000044.1     | 3834.8                     | rep21 (Rep_1)                                                                           | pWBG749 oriT-OT49 mimic + rep-rlx                  | none                                              |
|             |                                      |                     |                      |                               |                                                                         | pSauR181-3   | 2,528                 | JAHMHD010000045.1     | 3645.7                     | rep10 (RepL)                                                                            | none                                               | ermC                                              |

\*Abbreviations used: **β-lactams**: penicillin, P; oxacillin, OX; cefoxitin, FOX; cefoperazone, CFP; **fluoroquinolones**: ciprofloxacin, CIP; moxifloxacin, MXF; **macrolides**: erythromycin, E; **lincosamides**: clindamycin, DA; **aminoglycosides**: gentamicin, CN; amikacin, AK; **folate inhibitors**: co-trimoxazole, SXT; **fucidan**, fusidic acid, FD; **tetracyclines**: tetracycline, TE; doxycycline, DO; minocycline, MH; **glycylcyclines**: tigecycline, TGC; **phenicols**: chloramphenicol, C; **monocarboxylic acid**: mupirocin, MUP; **ansamycins**: rifampin, RD; **aminocoumarin**: novobiocin, NV; **glycopeptides**: vancomycin, VA; teicoplanin, TEC; **oxazolidinones**: linezolid, LZD; **phosphonic acids**: fosfomicin, FOT; **streptogramins**: quinupristin-dalfopristin, QD; **anti-MRSA cephalosporins**: ceftaroline, CPT. **MLS<sub>B</sub> phenotypes**: inducible (I), iMLSB; constitutive (C), cMLSB; macrolide-streptogramin, MS. MDR, multidrug resistance (resistance ≥ 3 classes of antimicrobials).



Supplementary Table S1

| Strain code | Year of isolation / Source of strain | Clonal Complex (CC) | Strain accession no. | Chromosome coverage (average) | Resistance phenotype*                                        | Plasmid name | Size of plasmid in bp | Plasmid accession no. | Plasmid coverage (average) | Replicon type (Conserved domain) | Mobility mechanism(s)             | Antimicrobial resistance determinant(s) |
|-------------|--------------------------------------|---------------------|----------------------|-------------------------------|--------------------------------------------------------------|--------------|-----------------------|-----------------------|----------------------------|----------------------------------|-----------------------------------|-----------------------------------------|
| SauR192     | 2019/ blood                          | CC22                | JAIUDU010000000      | 330.9                         | FOX, OX, P, CFP, CIP, MXF, E, DA; MDR (4 classes); iMLSB     | pSauR192-1   | 35,070                | JAIUDU010000030.1     | 1456.3                     | rep20 (RepA_N) + rep5a (Rep_3)   | Mob/pre (MOBV)                    | none                                    |
|             |                                      |                     |                      |                               |                                                              | pSauR192-2   | 3,050                 | JAIUDU010000048.1     | 5393.1                     | rep21 (Rep_1)                    | pWBG749 oriT-OT49 mimic + rep-rlx | none                                    |
|             |                                      |                     |                      |                               |                                                              | pSauR192-3   | 2,528                 | JAIUDU010000049.1     | 4520.6                     | rep10 (RepL)                     | none                              | ermC                                    |
| SauR193     | 2019/ blood                          | NA                  | JAIWL000000000       | 340.4                         | FOX, OX, P, CIP, MXF, CN; MDR (3 classes)                    | pSauR193     | 20,727                | JAIWL000000015.1      | 1404.5                     | rep5a (rep_3)                    | Mob/pre (MOBV)                    | bla operon                              |
| SauR200     | 2019/ pus                            | CC22                | JAKRCL000000000      | 413.3                         | FOX, OX, P, CIP, MXF, E, DA; MDR (4 classes); iMLSB          | pSauR200-1   | 35,336                | JAKRCL010000072       | 1851.0                     | rep20 (RepA_N) + rep5a (Rep_3)   | Mob/pre (MOBV)                    | none                                    |
|             |                                      |                     |                      |                               |                                                              | pSauR200-2   | 2,528                 | JAKRCL010000045       | 3662.6                     | rep10 (RepL)                     | none                              | ermC                                    |
| SauR203     | 2019/ pus                            | CC22                | JAKRCM000000000      | 417.9                         | FOX, OX, P, CIP, MXF, E, DA; MDR (4 classes); iMLSB          | pSauR203-1   | 35,336                | JAKRCM010000064       | 1806.2                     | rep20 (RepA_N) + rep5a (Rep_3)   | Mob/pre (MOBV)                    | none                                    |
|             |                                      |                     |                      |                               |                                                              | pSauR203-2   | 2,528                 | JAKRCM010000045       | 3338.1                     | rep10 (RepL)                     | none                              | ermC                                    |
| SauR204     | 2019/ tissue                         | CC22                | JAIUDV010000000      | 361.8                         | FOX, OX, P, CFP, CIP, MXF, E, DA; MDR (4 classes); iMLSB     | pSauR204-1   | 35,286                | JAIUDV010000031.1     | 1993.3                     | rep20 (RepA_N) + rep5a (Rep_3)   | Mob/pre (MOBV)                    | none                                    |
|             |                                      |                     |                      |                               |                                                              | pSauR204-2   | 2,528                 | JAIUDV010000045.1     | 2391.9                     | rep10 (RepL)                     | none                              | ermC                                    |
| SauR206     | 2019/ pus                            | CC22                | JAIUDW010000000      | 377.8                         | FOX, OX, P, CFP, CIP, MXF, E, DA; MDR (4 classes); iMLSB     | pSauR206-1   | 35,081                | JAIUDW010000030.1     | 1891.3                     | rep20 (RepA_N) + rep5a (Rep_3)   | Mob/pre (MOBV)                    | none                                    |
|             |                                      |                     |                      |                               |                                                              | pSauR206-2   | 2,528                 | JAIUDW010000044.1     | 2268.2                     | rep10 (RepL)                     | none                              | ermC                                    |
| SauR207     | 2019/ blood                          | CC1                 | JAHMHE000000000      | 351.5                         | FOX, P, CIP, MXF, E, DA, CN, SXT, FD; MDR (7 classes); iMLSB | pSauR207-1   | 20,652                | JAHMHE010000012.1     | 1223.2                     | rep5a (Rep_3)                    | Mob/pre (MOBV)                    | bla operon                              |
|             |                                      |                     |                      |                               |                                                              | pSauR207-2   | 2,473                 | JAHMHE010000017.1     | 1807.6                     | rep10 (RepL)                     | none                              | ermC                                    |
| SauR209     | 2019/ pus                            | CC1                 | JAHOPA000000000      | 345.0                         | FOX, OX, P, CN, FD, TE, DO; MDR (4 classes)                  | pSauR209     | 25,167                | JAHOPA010000017       | 1718.7                     | rep5a (Rep_3) + Δrep13 (ΔRep_1)  | Mob/pre (MOBV)                    | bla operon+ tetL                        |
| SauR210     | 2019/ blood                          | CC22                | JAIXHD000000000      | 447.6                         | FOX, OX, P, CFP, CIP, MXF, E, DA; MDR (4 classes); iMLSB     | pSauR210-1   | 3,011                 | JAIXHD010000034.1     | 1885.0                     | rep21 (Rep_1)                    | pWBG749 oriT-OT49 mimic + rep-rlx | none                                    |
|             |                                      |                     |                      |                               |                                                              | pSauR210-2   | 2,473                 | JAIXHD010000036.1     | 1374.7                     | rep10 (RepL)                     | none                              | ermC                                    |
| SauR211     | 2019/ pus                            | CC22                | JAIXHE000000000      | 347.3                         | FOX, OX, P, CFP, CIP, MXF, RD; MDR (3 classes)               | pSauR211     | 3011                  | JAIXHE010000033.1     | 2214.2                     | rep21 (Rep_1)                    | pWBG749 oriT-OT49 mimic + rep-rlx | none                                    |

\*Abbreviations used: **β-lactams**: penicillin, P; oxacillin, OX; cefoxitin, FOX; cefoperazone, CFP; **fluoroquinolones**: ciprofloxacin, CIP; moxifloxacin, MXF; **macrolides**: erythromycin, E; **lincosamides**: clindamycin, DA; **aminoglycosides**: gentamicin, CN; amikacin, AK; **folate inhibitors**: co-trimoxazole, SXT; **fucidanes**, fusidic acid, FD; **tetracyclines**: tetracycline, TE; doxycycline, DO; minocycline, MH; **glycylcyclines**: tigecycline, TGC; **phenicols**: chloramphenicol, C; **monocarboxylic acid**: mupirocin, MUP; **ansamycins**: rifampin, RD; **aminocoumarin**: novobiocin, NV; **glycopeptides**: vancomycin, VA; teicoplanin, TEC; **oxazolidinones**: linezolid, LZD; **phosphonic acids**: fosfomicin, FOT; **streptogramins**: quinupristin-dalfopristin, QD; **anti-MRSA cephalosporins**: ceftaroline, CPT. **MLS<sub>B</sub> phenotypes**: inducible (I), iMLSB; constitutive (C), cMLSB; macrolide-streptogramin, MS. MDR, multidrug resistance (resistance ≥ 3 classes of antimicrobials).

Supplementary Table S1

| Strain code | Year of isolation / Source of strain | Clonal Complex (CC) | Strain accession no. | Chromosome coverage (average) | Resistance phenotype*                                        | Plasmid name        | Size of plasmid in bp | Plasmid accession no. | Plasmid coverage (average) | Replicon type (Conserved domain)                                 | Mobility mechanism(s)             | Antimicrobial resistance determinant(s) |
|-------------|--------------------------------------|---------------------|----------------------|-------------------------------|--------------------------------------------------------------|---------------------|-----------------------|-----------------------|----------------------------|------------------------------------------------------------------|-----------------------------------|-----------------------------------------|
| SauR221     | 2019/ pus                            | CC1                 | JAHMHF000000000      | 312.7                         | FOX, P, CIP, CN, MXF, E, DA, FD; MDR (6 classes); iMLSB      | pSauR221-1          | 20,652                | JAHMHF010000012.1     | 1128.7                     | rep5a (Rep_3)                                                    | Mob/pre (MOBV)                    | bla operon                              |
|             |                                      |                     |                      |                               |                                                              | pSauR221-2          | 2,473                 | JAHMHF010000016.1     | 3857.3                     | rep10 (RepL)                                                     | none                              | ermC                                    |
| SauR222     | 2019/ blood                          | CC22                | JAIUEB010000000      | 433.7                         | FOX, OX, P, CFP, CIP, E, DA; MDR (4 classes) cMLSB           | pSauR222-1          | 35,286                | JAIUEB010000029.1     | 1614.2                     | rep20 (RepA_N) + rep5a (Rep_3)                                   | Mob/pre (MOBV)                    | none                                    |
|             |                                      |                     |                      |                               |                                                              | pSauR222-2          | 2,422                 | JAIUEB010000049.1     | 2267.4                     | rep10 (RepL)                                                     | none                              | ermC                                    |
| SauR223     | 2019/ pus                            | NA                  | JAIWLW000000000      | 387.6                         | FOX,P,E, DA,TE; MDR (4 classes); iMLSB                       | pSauR223-1          | 21,497                | JAIWLW010000017.1     | 1614.4                     | rep20 (RepA_N) + rep5a (Rep_3) + $\Delta$ rep21( $\Delta$ Rep_1) | Mob/pre (MOBV)                    | bla operon                              |
|             |                                      |                     |                      |                               |                                                              | pSauR223-2          | 4,534                 | JAIWLW010000020.1     | 1627.5                     | rep7a (Rep_trans)                                                | Mob/pre (MOBV)                    | tetK                                    |
|             |                                      |                     |                      |                               |                                                              | pSauR223-3          | 2,473                 | JAIWLW010000022.1     | 1345.7                     | rep10 (RepL)                                                     | none                              | ermC                                    |
| SauR224     | 2019/ Nasopharyngeal                 | CC22                | JAIXHF000000000      | 410.4                         | FOX, OX, P, CFP, CIP, E, DA; MDR (4 classes); iMLSB          | pSauR224-1          | 3011                  | JAIXHF010000034.1     | 2089.6                     | rep21 (Rep_1)                                                    | pWBG749 oriT-OT49 mimic + rep-rlx | none                                    |
|             |                                      |                     |                      |                               |                                                              | pSauR224-2          | 2,473                 | JAIXHF010000036.1     | 1568.0                     | rep10 (RepL)                                                     | none                              | ermC                                    |
| SauR225     | 2019/ Respiratory                    | CC22                | JAIUDX010000000      | 389.6                         | FOX, OX, P, CIP, MXF, E, DA; MDR (4 classes); iMLSB          | pSauR225-1          | 35,336                | JAIUDX010000030.1     | 1619.0                     | rep20 (RepA_N) + rep5a (Rep_3)                                   | Mob/pre (MOBV)                    | none                                    |
|             |                                      |                     |                      |                               |                                                              | pSauR225-2          | 3,050                 | JAIUDX010000044.1     | 1410.3                     | rep21 (Rep_1)                                                    | pWBG749 oriT-OT49 mimic + rep-rlx | none                                    |
|             |                                      |                     |                      |                               |                                                              | pSauR225-3          | 2,528                 | JAIUDX010000045.1     | 999.4                      | rep10 (RepL)                                                     | none                              | ermC                                    |
| SauR235     | 2019/ pus                            | CC22                | JAIUDY010000000      | 439.2                         | FOX, OX, P, CIP, E, DA; MDR (4 classes); iMLSB               | pSauR235-1          | 35,501                | JAIUDY010000032.1     | 1793.1                     | rep20 (RepA_N) + rep5a (Rep_3)                                   | Mob/pre (MOBV)                    | none                                    |
|             |                                      |                     |                      |                               |                                                              | pSauR235-2          | 2,528                 | JAIUDY010000050.1     | 1497.3                     | rep10 (RepL)                                                     | none                              | ermC                                    |
| SauR248     | 2019/ pus                            | NA                  | JAIXHG000000000      | 381.1                         | FOX, P, CIP, MXF, CN; MDR (3 classes)                        | no plasmid detected | -                     | -                     | NA                         | -                                                                | -                                 | -                                       |
| SauR253     | 2020/ pus                            | NA                  | JAIWLX000000000      | 374.5                         | FOX, OX, P, CIP, MXF, CN, TGC; MDR (4 classes)               | pSauR253            | 20,727                | JAIWLX010000018.1     | 1251.9                     | rep5a (Rep_3)                                                    | Mob/pre (MOBV)                    | bla operon                              |
| SauR255     | 2020/ urine                          | NA                  | JAKRCN000000000      | 349.3                         | FOX, OX, P, CIP, MXF, E, DA, CN, TGC. MDR (5 classes); iMLSB | pSauR255            | 20,727                | JAKRCN010000013       | 1589.5                     | rep5a (Rep_3)                                                    | Mob/pre (MOBV)                    | bla operon                              |

\*Abbreviations used:  **$\beta$ -lactams**: penicillin, P; oxacillin, OX; cefoxitin, FOX; cefoperazone, CFP; **fluoroquinolones**: ciprofloxacin, CIP; moxifloxacin, MXF; **macrolides**: erythromycin, E; **lincosamides**: clindamycin, DA; **aminoglycosides**: gentamicin, CN; amikacin, AK; **folate inhibitors**: co-trimoxazole, SXT; **fucidan**, fusidic acid, FD; **tetracyclines**: tetracycline, TE; doxycycline, DO; minocycline, MH; **glycylcyclines**: tigecycline, TGC; **phenicols**: chloramphenicol, C; **monocarboxylic acid**: mupirocin, MUP; **ansamycins**: rifampin, RD; **aminocoumarin**: novobiocin, NV; **glycopeptides**: vancomycin, VA; teicoplanin, TEC; **oxazolidinones**: linezolid, LZD; **phosphonic acids**: fosfomicin, FOT; **streptogramins**: quinupristin-dalfopristin, QD; **anti-MRSA cephalosporins**: ceftaroline, CPT. **MLS<sub>B</sub> phenotypes**: inducible (I), iMLSB; constitutive (C), cMLSB; macrolide-streptogramin, MS. MDR, multidrug resistance (resistance  $\geq$  3 classes of antimicrobials).

Supplementary Table S1

| Strain code | Year of isolation / Source of strain | Clonal Complex (CC) | Strain accession no. | Chromosome coverage (average) | Resistance phenotype*                                    | Plasmid name | Size of plasmid in bp | Plasmid accession no. | Plasmid coverage (average) | Replicon type (Conserved domain)  | Mobility mechanism(s)             | Antimicrobial resistance determinant(s) |
|-------------|--------------------------------------|---------------------|----------------------|-------------------------------|----------------------------------------------------------|--------------|-----------------------|-----------------------|----------------------------|-----------------------------------|-----------------------------------|-----------------------------------------|
| SauR257     | 2020/ blood                          | NA                  | JAIXAI000000000      | 431.2                         | FOX, OX, P, CIP, CN, MXF; MDR (3 classes)                | pSauR257     | 20,727                | JAIXAI010000017.1     | 1984.4                     | rep5a (Rep_3)                     | Mob/pre (MOBV)                    | bla operon                              |
| SauR258     | 2020/ blood                          | NA                  | JAIXAJ000000000      | 457.7                         | FOX, OX, P, CIP, MXF, CN, TGC. MDR (4 classes)           | pSauR258     | 20,728                | JAIXAJ010000017.1     | 1525.5                     | rep5a (Rep_3)                     | Mob/pre (MOBV)                    | bla operon                              |
| SauR261     | 2020/ blood                          | NA                  | JAIXAK000000000      | 445.5                         | FOX, OX, P, CIP, FD; MDR (3 classes)                     | pSauR261     | 20,728                | JAIXAK010000013.1     | 1880.8                     | rep5a (Rep_3)                     | Mob/pre (MOBV)                    | bla operon                              |
| SauR262     | 2020/ pus                            | CC5                 | JAKRCO000000000      | 419.6                         | FOX, P, E, TGC; MDR (3 classes); MS                      | pSauR262     | 14,935                | JAKRCO010000017       | 1236.5                     | repUS23 (RepA_N)+ repUS46 (rep_2) | none                              | none                                    |
| SauR263     | 2020/ blood                          | CC22                | JAKRCP000000000      | 381.5                         | FOX, OX, P, CIP, CFP, MXF, E, DA; MDR (4 classes); iMLSB | pSauR263-1   | 35,334                | JAKRCP010000082       | 1770.5                     | rep20 (RepA_N) + rep5a (Rep_3)    | Mob/pre (MOBV)                    | none                                    |
|             |                                      |                     |                      |                               |                                                          | pSauR263-2   | 3,050                 | JAKRCP010000049       | 1342.5                     | rep21 (Rep_1)                     | pWBG749 oriT-OT49 mimic + rep-rlx | none                                    |
|             |                                      |                     |                      |                               |                                                          | pSauR263-3   | 2,528                 | JAKRCP010000051       | 1178.9                     | rep10 (RepL)                      | none                              | ermC                                    |
| SauR265     | 2020/ blood                          | CC22                | JAKRCQ000000000      | 395.0                         | FOX, OX, P, CIP, MXF, E, DA; MDR (4 classes); iMLSB      | pSauR265-1   | 3,011                 | JAKRCQ010000032       | 1380.3                     | rep21 (Rep_1)                     | pWBG749 oriT-OT49 mimic + rep-rlx | none                                    |
|             |                                      |                     |                      |                               |                                                          | pSauR265-2   | 2,418                 | JAKRCQ010000034       | 1180.2                     | rep10 (RepL)                      | none                              | ermC                                    |
| SauR266     | 2020/ blood                          | CC22                | JAIXHH000000000      | 404.5                         | FOX, OX, P, CIP, E, DA; MDR (4 classes); iMLSB           | pSauR266     | 2,462                 | JAIXHH010000029.1     | 1887.5                     | rep10 (RepL)                      | none                              | ermC                                    |
| SauR268     | 2020/ blood                          | CC22                | JAIUDZ010000000      | 343.8                         | FOX, OX, P, CIP, E, DA; MDR (4 classes); iMLSB           | pSauR268-1   | 35,336                | JAIUDZ010000029.1     | 1560.3                     | rep20 (RepA_N) + rep5a (Rep_3)    | Mob/pre (MOBV)                    | none                                    |
|             |                                      |                     |                      |                               |                                                          | pSauR268-2   | 3,050                 | JAIUDZ010000042.1     | 5045.9                     | rep21 (Rep_1)                     | pWBG749 oriT-OT49 mimic + rep-rlx | none                                    |
|             |                                      |                     |                      |                               |                                                          | pSauR268-3   | 2,528                 | JAIUDZ010000043.1     | 4007.9                     | rep10 (RepL)                      | none                              | ermC                                    |
| SauR269     | 2020/ pus                            | CC22                | JAKRCR000000000      | 251.6                         | FOX, OX, P, CIP, MXF, E, DA; MDR (4 classes); iMLSB      | pSauR269-1   | 35,332                | JAKRCR010000170       | 1025.8                     | rep20 (RepA_N) + rep5a (Rep_3)    | Mob/pre (MOBV)                    | none                                    |
|             |                                      |                     |                      |                               |                                                          | pSauR269-2   | 14,935                | JAKRCR010000051       | 144.9                      | repUS23 (RepA_N)+ repUS46 (Rep_2) | none                              | none                                    |
|             |                                      |                     |                      |                               |                                                          | pSauR269-3   | 2,473                 | JAKRCR010000081       | 1107.4                     | rep10 (RepL)                      | none                              | ermC                                    |

\*Abbreviations used:  **$\beta$ -lactams**: penicillin, P; oxacillin, OX; cefoxitin, FOX; cefoperazone, CFP; **fluoroquinolones**: ciprofloxacin, CIP; moxifloxacin, MXF; **macrolides**: erythromycin, E; **lincosamides**: clindamycin, DA; **aminoglycosides**: gentamicin, CN; amikacin, AK; **folate inhibitors**: co-trimoxazole, SXT; **fucidan**, fusidic acid, FD; **tetracyclines**: tetracycline, TE; doxycycline, DO; minocycline, MH; **glycylcyclines**: tigecycline, TGC; **phenicols**: chloramphenicol, C; **monocarboxylic acid**: mupirocin, MUP; **ansamycins**: rifampin, RD; **aminocoumarin**: novobiocin, NV; **glycopeptides**: vancomycin, VA; teicoplanin, TEC; **oxazolidinones**: linezolid, LZD; **phosphonic acids**: fosfomicin, FOT; **streptogramins**: quinupristin-dalfopristin, QD; **anti-MRSA cephalosporins**: ceftaroline, CPT. **MLS<sub>B</sub> phenotypes**: inducible (I), iMLSB; constitutive (C), cMLSB; macrolide-streptogramin, MS. MDR, multidrug resistance (resistance  $\geq$  3 classes of antimicrobials).

## Genome data of other Malaysian MRSA strains retrieved from GenBank:

| Strain code    | Year of isolation/<br>Source of strain    | Clonal Complex (CC) | Strain accession no.        | Chromosome coverage (average)                      | Resistance phenotype* | Plasmid name | Size of plasmid in bp                                                                                                      | Plasmid accession no.                   | Plasmid coverage (average)                                         | Replicon type (Conserved domain) |
|----------------|-------------------------------------------|---------------------|-----------------------------|----------------------------------------------------|-----------------------|--------------|----------------------------------------------------------------------------------------------------------------------------|-----------------------------------------|--------------------------------------------------------------------|----------------------------------|
| SAZ_1          | 2012 /<br>body fluid<br>from<br>infection | CC8                 | BioProject :<br>PRJNA503680 | PEN, FOX, OX                                       | pSAZ_1-1              | 29,265       | multi-contigs:<br>SDOB01000025.1<br>SDOB01000029.1<br>SDOB01000032.1<br>SDOB01000039.1<br>SDOB01000050.1                   | rep20<br>(RepA_N)<br>+ rep21<br>(Rep_1) | pWBG749 oriT-<br>OTUNa+<br>pWBG749 oriT-OT49<br>mimic<br>+ rep-rlx | none                             |
|                |                                           |                     |                             |                                                    | pSAZ_1-2              | 4,442        | SDOB01000031.1                                                                                                             | rep7a<br>(Rep_trans)                    | Mob/pre (MOBV)                                                     | cat                              |
| SAZ_31         | 2013 / pus                                | CC30                | BioProject :<br>PRJNA503680 | PEN, FOX, OX, NOR, CN, CIP, FD                     | pSAZ_31-1             | 24,749       | multi-contigs:<br>SDOE01000022.1<br>SDOE01000026.1                                                                         | rep19<br>(RepA_N)<br>+ rep21<br>(Rep_1) | pWBG749 oriT-OT49<br>mimic + rep-rlx                               | bla operon                       |
| MRSA<br>SAZ_10 | 2012 / pus                                | CC8                 | BioProject :<br>PRJNA503680 | PEN, FOX, OX, NOR, DA, E;<br>iMLSB                 | pSAZ10A               | 35,123       | SWED01000025.1                                                                                                             | rep15<br>(RepA_N)                       | conjugative                                                        | ant(4')-lb, mupA                 |
|                |                                           |                     |                             |                                                    | pSAZ10B               | 29,214       | multi-contigs:<br>SWED01000032.1<br>SWED01000035.1<br>SWED01000038.1<br>SWED01000045.1<br>SWED01000046.1<br>SWED01000055.1 | rep20<br>(RepA_N)<br>+ rep21<br>(Rep_1) | pWBG749 oriT-<br>OTUNa+<br>pWBG749 oriT-OT49<br>mimic<br>+ rep-rlx | none                             |
|                |                                           |                     |                             |                                                    | pSAZ1C                | 2,736        | SWED01000040.1                                                                                                             | rep10<br>(RepL)                         | none                                                               | ermC                             |
| ZS_Z30         | 2016 /<br>nasal swab                      | CC8                 | BioProject :<br>PRJNA503680 | PEN, FOX, OX, TE, CN, DA, SXT, E,<br>CIP;<br>cMLSB | pZS_Z30-1             | 21,173       | multi-contigs:<br>RZHI01000026.1<br>RZHI01000033.1<br>RZHI01000042.1                                                       | rep20<br>(RepA_N)<br>+ rep21<br>(Rep_1) | pWBG749 oriT-<br>OTUNa+<br>pWBG749 oriT-OT49<br>mimic + rep-rlx    | none                             |
|                |                                           |                     |                             |                                                    | pZS_Z30-2             | 2,723        | RZHI01000036.1                                                                                                             | rep21<br>(Rep_1)                        | rep-rlx                                                            | none                             |
| ZS-Z37         | 2016 /<br>nasal swab                      | CC8                 | BioProject :<br>PRJNA503680 | PEN, FOX, OX, TE, CN, SXT, E, CIP;<br>iMLSB        | pZS-Z37-1             | 26,250       | multi-contigs:<br>RZHI01000023.1<br>RZHI01000036.1<br>RZHI01000060.1                                                       | rep20<br>(RepA_N)<br>+ rep21<br>(Rep_1) | pWBG749 oriT-<br>OTUNa+<br>pWBG749 oriT-OT49<br>mimic + rep-rlx    | none                             |
|                |                                           |                     |                             |                                                    | pZS-Z37-2             | 4,714        | RZHI01000039.1                                                                                                             | rep7a<br>(Rep_trans)                    | MOBV/Mob_Pre                                                       | tetK                             |

\*Abbreviations used:  **$\beta$ -lactams**: penicillin, P; oxacillin, OX; cefoxitin, FOX; cefoperazone, CFP; **fluoroquinolones**: ciprofloxacin, CIP; moxifloxacin, MXF; **macrolides**: erythromycin, E; **lincosamides**: clindamycin, DA; **aminoglycosides**: gentamicin, CN; amikacin, AK; **folate inhibitors**: co-trimoxazole, SXT; **fucidanes**, fusidic acid, FD; **tetracyclines**: tetracycline, TE; doxycycline, DO; minocycline, MH; **glycylcyclines**: tigecycline, TGC; **phenicols**: chloramphenicol, C; **monocarboxylic acid**: mupirocin, MUP; **ansamycins**: rifampin, RD; **aminocoumarin**: novobiocin, NV; **glycopeptides**: vancomycin, VA; teicoplanin, TEC; **oxazolidinones**: linezolid, LZD; **phosphonic acids**: fosfomicin, FOT; **streptogramins**: quinupristin-dalfopristin, QD; **anti-MRSA cephalosporins**: ceftaroline, CPT. **MLS<sub>B</sub> phenotypes**: inducible (I), iMLSB; constitutive (C), cMLSB; macrolide-streptogramin, MS. MDR, multidrug resistance (resistance  $\geq$  3 classes of antimicrobials).

Supplementary Table S1

| Strain code    | Year of isolation/<br>Source of strain | Clonal Complex (CC) | Strain accession no.     | Chromosome coverage (average)            | Resistance phenotype* | Plasmid name | Size of plasmid in bp                                                                                                                                                            | Plasmid accession no.           | Plasmid coverage (average)                      | Replicon type (Conserved domain) |
|----------------|----------------------------------------|---------------------|--------------------------|------------------------------------------|-----------------------|--------------|----------------------------------------------------------------------------------------------------------------------------------------------------------------------------------|---------------------------------|-------------------------------------------------|----------------------------------|
| A54_B          | 2016 / nasal swab                      | NA                  | BioProject : PRJNA503680 | PEN, TE                                  | no plasmid detected   | -            | -                                                                                                                                                                                | -                               | -                                               | -                                |
| SAZ_16         | 2013 / blood                           | CC1                 |                          | PEN, FOX, OX, NOR, CN, CIP, FD           | no plasmid detected   | -            | -                                                                                                                                                                                | -                               | -                                               | -                                |
| SAZ_10         | 2012/ pus                              | CC8                 |                          | PEN, FOX, OX, NOR, DA, E (iMLSB)         | no plasmid detected   | -            | -                                                                                                                                                                                | -                               | -                                               | -                                |
| ZS_Z46         | 2016 / nasal swab                      | CC8                 |                          | PEN, FOX, OX, TE, CN, SXT, E, CIP; iMLSB | no plasmid detected   | -            | -                                                                                                                                                                                | -                               | -                                               | -                                |
| KT/Y21         | 2009 / blood                           | CC1                 | AOCQ00000000.1           | PEN, FOX, OX, FD, MUP, N, KAN, CN        | no plasmid detected   | -            | -                                                                                                                                                                                | -                               | -                                               | -                                |
| MRSA_PR 1      | 2009 / blood                           | CC8                 | ANPO00000000.1           | unavailable                              | no plasmid detected   | -            | -                                                                                                                                                                                | -                               | -                                               | -                                |
| PPUKM-261-2009 | 2009 / tracheal aspirate               | NA                  | AMRB00000000.1           | unavailable                              | pPPUKM-261-2009-1     | 25,327       | multi-contigs:<br>AMRB01000083.1<br>AMRB01000003.1<br>AMRB01000078.1<br>AMRB01000086.1<br>AMRB01000082.1<br>AMRB01000091.1<br>AMRB01000092.1<br>AMRB01000093.1<br>AMRB01000094.1 | rep20 (RepA_N)                  | pWBG749 oriT-OUNa+<br>pWBG749 oriT-OT49 mimics  | none                             |
| PPUKM-332-2009 | 2009 / tracheal aspirate               | CC8                 | AMRC00000000.1           | unavailable                              | pPPUKM-332-2009-1     | 24,010       | multi-contigs:<br>AMRC01000117.1<br>AMRC01000113.1<br>AMRC01000114.1<br>AMRC01000115.1<br>AMRC01000118.1<br>AMRC01000124.1                                                       | rep20 (RepA_N)                  | pWBG749 oriT-OTUNa+<br>pWBG749 oriT-OT49 mimics | none                             |
|                |                                        |                     |                          |                                          | pPPUKM-332-2009-2     | 4,260        | AMRC01000004.1                                                                                                                                                                   | rep7a (Rep_trans)               | MOBV/Mob_pre                                    | cat                              |
| PPUKM-377-2009 | 2009 / tracheal aspirate               | CC5                 | AMRD00000000.1           | unavailable                              | pPPUKM-377-2009-1     | 28,544       | multi-contigs:<br>AMRD01000082.1<br>AMRD01000084.1<br>AMRD01000086.1<br>AMRD01000091.1<br>AMRD01000092.1<br>AMRD01000094.1<br>AMRD01000079.1                                     | rep19 (RepA_N) + rep20 (RepA_N) | pWBG749 oriT-OTUNa+<br>pWBG749 oriT-OT49 mimics | none                             |
|                |                                        |                     |                          |                                          | pPPUKM-377-2009-2     | 2,478        | AMRD01000090.1                                                                                                                                                                   | rep10 (repL)                    | none                                            | ermC                             |

\*Abbreviations used:  **$\beta$ -lactams**: penicillin, P; oxacillin, OX; cefoxitin, FOX; cefoperazone, CFP; **fluoroquinolones**: ciprofloxacin, CIP; moxifloxacin, MXF; **macrolides**: erythromycin, E; **lincosamides**: clindamycin, DA; **aminoglycosides**: gentamicin, CN; amikacin, AK; **folate inhibitors**: co-trimoxazole, SXT; **fucidan**, fusidic acid, FD; **tetracyclines**: tetracycline, TE; doxycycline, DO; minocycline, MH; **glycylcyclines**: tigecycline, TGC; **phenicols**: chloramphenicol, C; **monocarboxylic acid**: mupirocin, MUP; **ansamycins**: rifampin, RD; **aminocoumarin**: novobiocin, NV; **glycopeptides**: vancomycin, VA; teicoplanin, TEC; **oxazolidinones**: linezolid, LZD; **phosphonic acids**: fosfomicin, FOT; **streptogramins**: quinupristin-dalfopristin, QD; **anti-MRSA cephalosporins**: ceftaroline, CPT. **MLS<sub>B</sub> phenotypes**: inducible (I), iMLSB; constitutive (C), cMLSB; macrolide-streptogramin, MS. MDR, multidrug resistance (resistance  $\geq$  3 classes of antimicrobials).

Supplementary Table S1

| Strain code    | Year of isolation/<br>Source of strain | Clonal Complex (CC) | Strain accession no. | Chromosome coverage (average) | Resistance phenotype* | Plasmid name | Size of plasmid in bp                                                                                    | Plasmid accession no. | Plasmid coverage (average) | Replicon type (Conserved domain) |
|----------------|----------------------------------------|---------------------|----------------------|-------------------------------|-----------------------|--------------|----------------------------------------------------------------------------------------------------------|-----------------------|----------------------------|----------------------------------|
| PPUKM-775-2009 | 2009 / tracheal aspirate               | CC8                 | AMRE00000000.1       | unavailable                   | pPPUKM-775-2009-1     | 20,294       | multi-contigs:<br>AMRE01000085.1<br>AMRE01000089.1<br>AMRE01000080.1<br>AMRE01000096.1<br>AMRE01000097.1 | rep20 (RepA_N)        | pWBG749 oriT-OTUNa mimic   | none                             |

\*Abbreviations used:  **$\beta$ -lactams**: penicillin, P; oxacillin, OX; cefoxitin, FOX; cefoperazone, CFP; **fluoroquinolones**: ciprofloxacin, CIP; moxifloxacin, MXF; **macrolides**: erythromycin, E; **lincosamides**: clindamycin, DA; **aminoglycosides**: gentamicin, CN; amikacin, AK; **folate inhibitors**: co-trimoxazole, SXT; **fucidanes**, fusidic acid, FD; **tetracyclines**: tetracycline, TE; doxycycline, DO; minocycline, MH; **glycylcyelines**: tigecycline, TGC; **phenicols**: chloramphenicol, C; **monocarboxylic acid**: mupirocin, MUP; **ansamycins**: rifampin, RD; **aminocoumarin**: novobiocin, NV; **glycopeptides**: vancomycin, VA; teicoplanin, TEC; **oxazolidinones**: linezolid, LZD; **phosphonic acids**: fosfomycin, FOT; **stretogramins**: quinupristin-dalfopristin, QD; **anti-MRSA cephalosporins**: ceftaroline, CPT. **MLS<sub>B</sub> phenotypes**: inducible (I), iMLSB; constitutive (C), cMLSB; macrolide-streptogramin, MS. MDR, multidrug resistance (resistance  $\geq$  3 classes of antimicrobials).

**Supplementary Table S2:** List of primers used for gap closures and sequence validation of identified plasmids.

| Primer sequences (5'→3')                                                                                                                                                                                                                                                                                            | Description                                                        |
|---------------------------------------------------------------------------------------------------------------------------------------------------------------------------------------------------------------------------------------------------------------------------------------------------------------------|--------------------------------------------------------------------|
| F: ACGCTTTATAAAATGCATCGAACAC<br>R: TGTCGTA CTCTGTCATTTGACC                                                                                                                                                                                                                                                          | Used to validate pSauR127 and pSauR209 sequences                   |
| F: CCAAGACAGCTCAAAC TAATACCAAT<br>R: CATTTATGGCGTGTAGAAATCGAAC                                                                                                                                                                                                                                                      | Used to validate pSauR7 and pSauR76-2 sequences                    |
| F1: GTCCAATTTGACATAGAGCCTTGATC<br>R1: CTGTTAATGGTTCTGATGGGCAG<br>F2: CCTGCCCATCAGAACCATTAAACAG<br>R2: CAGTTGATCGTGCGTTTACCT                                                                                                                                                                                         | Used to close and validate gaps in the 35 kb heavy metal plasmids. |
| F3: GCGAACATCACGTTTGCCATC<br>R3: GACGTTATATCTCTGGAACCTGGAC<br>Internal-F3: AGAGTAAATCCTAATACTG                                                                                                                                                                                                                      |                                                                    |
| F4: GCAGCTTTAGCTTTACATACTCTCG<br>R4: GATCAAGGCTCTATGTCAAATTGGAC                                                                                                                                                                                                                                                     | Used to close gaps in pSauR47-1.                                   |
| F1: GCAATCGCAACGATAAATAG<br>R1: GGACAAAATGTGATTTAAATGAC<br>F2: GAGCGTACACATGAACTTTC<br>R2: TACGACTGATGAGAGTGAAG<br>F3: GCTTCCCAATCCTCCTATCA<br>R3: GGTTC AAGACATTCAAGGAAATC                                                                                                                                         | Used to close gaps in pSauR76-1                                    |
| F: AGTCGTTAGAAGCTCATATTTGCG<br>R: AGAGAGATGTCACCGTCAAG                                                                                                                                                                                                                                                              | Used to validate pSauR156-1 sequence.                              |
| F: AGATGGGTGTTTGGAGTTATCG<br>R: AGCTACTGCAATTAACGCAATC                                                                                                                                                                                                                                                              | Used to validate pSauR23-1 sequence.                               |
| F1: ACTTGAAGATAGTGAAGAAGAAATAGG<br>R1: AGGGTAATTTAAATGGCGAATGG<br>F2: AAGGGTGTGCTTAAATCGGG<br>R2: ACCGTCATCTTCCATGTAGC<br>F3: TACGAAAATGCAAAGCCACT<br>R3: AGCAGCAGTTACAATAGTCTGAATC<br>F4: ATGCAAATGAGATCTTCTCACAGC<br>R4: ACTTCTTCCATAAACTCAGTCAAGTCC<br>F5: GTTATTGGTTTGTATCAATTCC<br>R5: GTCATAGTTTGTGAAAATAAGTT | Used to close and validate gaps in pSauR165-1.                     |
| F1: AGTGAGAACTTCTGGTAATCATC<br>R1: AGCCAACTATACTTTTATTCCCG<br>F2: AGCCTGTACACGACTGATAG<br>R2: ACTCCAGTAATATGATTAAGGTGTC<br>F3: TAGACTTGAAACCGTTGATATCACAG<br>R3: TCACTGAAAGATAAAATTCCTAAGC                                                                                                                          |                                                                    |
| F: TGAATCGTTGATATGACGGCG<br>R: ATACACCTCCTCTCTGCGTC                                                                                                                                                                                                                                                                 |                                                                    |
| F: AGAGTGTGTCATTACTTTAGACTG<br>R: CCATGTGTATGATTATGATTGTGATCGT                                                                                                                                                                                                                                                      |                                                                    |
|                                                                                                                                                                                                                                                                                                                     |                                                                    |
